# Supplementary material
Source: publisher figshare collection journal article supplement (https://gsajournals.figshare.com/articles/dataset/_/7149386)
Supplement: Supplementary file 1 [file 1]

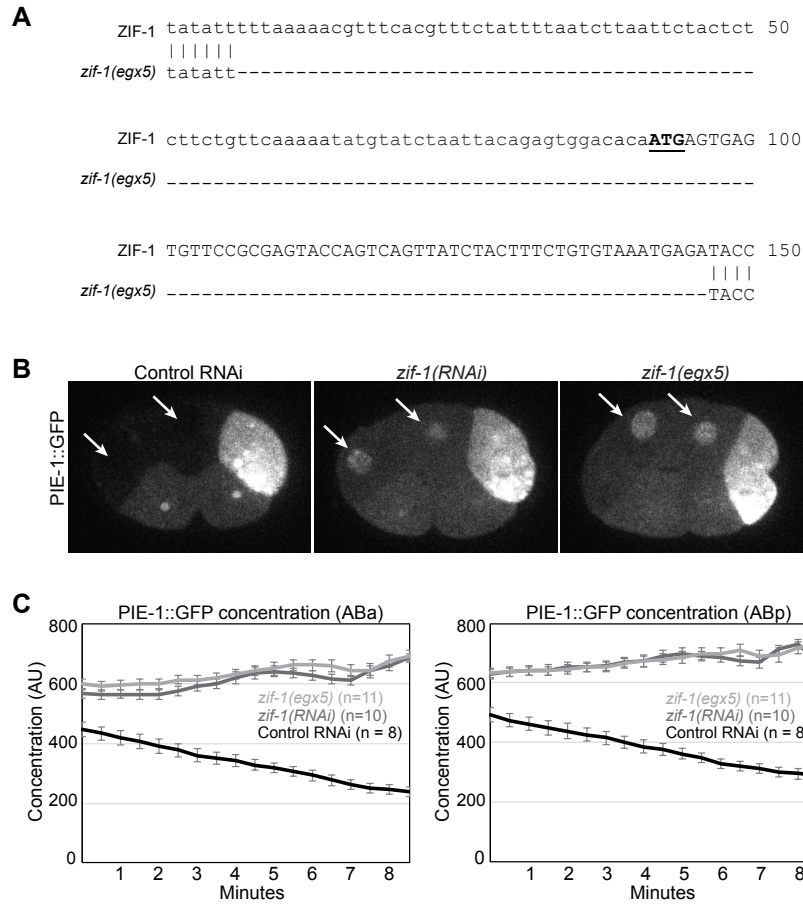

**Figure S1.** Characterization of the *zif-1(egx5)* allele. **A.** Deletion in the *zif-1(egx5)* allele. The *zif-1* translational start codon is in bold and underlined. **B.** PIE-1::GFP degradation in somatic cells is defective in both *zif-1(RNAi)* and *zif-1(egx5)* embryos. White arrows indicate PIE-1::GFP that has not been degraded in somatic cells. **C.** Quantification of PIE-1::GFP in the somatic cells ABA and ABp in Control RNAi, *zif-1(RNAi)*, and *zif-1(egx5)* embryos. ABA and ABp were analyzed in the same embryos. Error bars indicate SEM.
