# Supplementary material
Source: publisher figshare collection journal article supplement (https://gsajournals.figshare.com/articles/dataset/_/7149386)
Supplement: Supplementary file 2 [file 1]

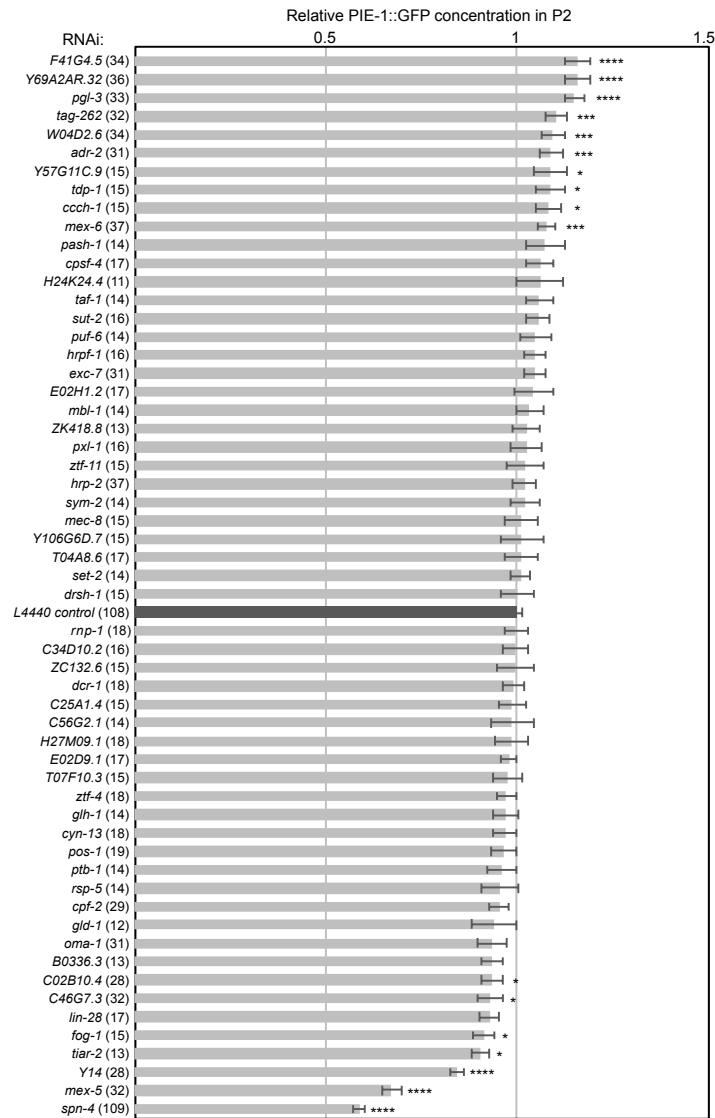

**Figure S2.** PIE-1::GFP concentration in P2 of the embryos depleted of the indicated gene, relative to the L4440 control RNAi. The results shown are of a re-test of the indicated RNAi clones following an initial screen of 249 RNAi clones. The number of embryos for each RNAi condition are shown in parentheses. Error bars indicate SEM.
